# Supplementary material for: Genomics and transcriptomics landscapes associated to changes in insulin sensitivity in response to endurance exercise training
Source: PubMed Central journal article supplement (PMC8639975; doi:10.1038/s41598-021-98792-1), 2021-12-02
Supplement: 41598_2021_98792_MOESM1_ESM.pdf [file 41598_2021_98792_MOESM1_ESM.pdf]

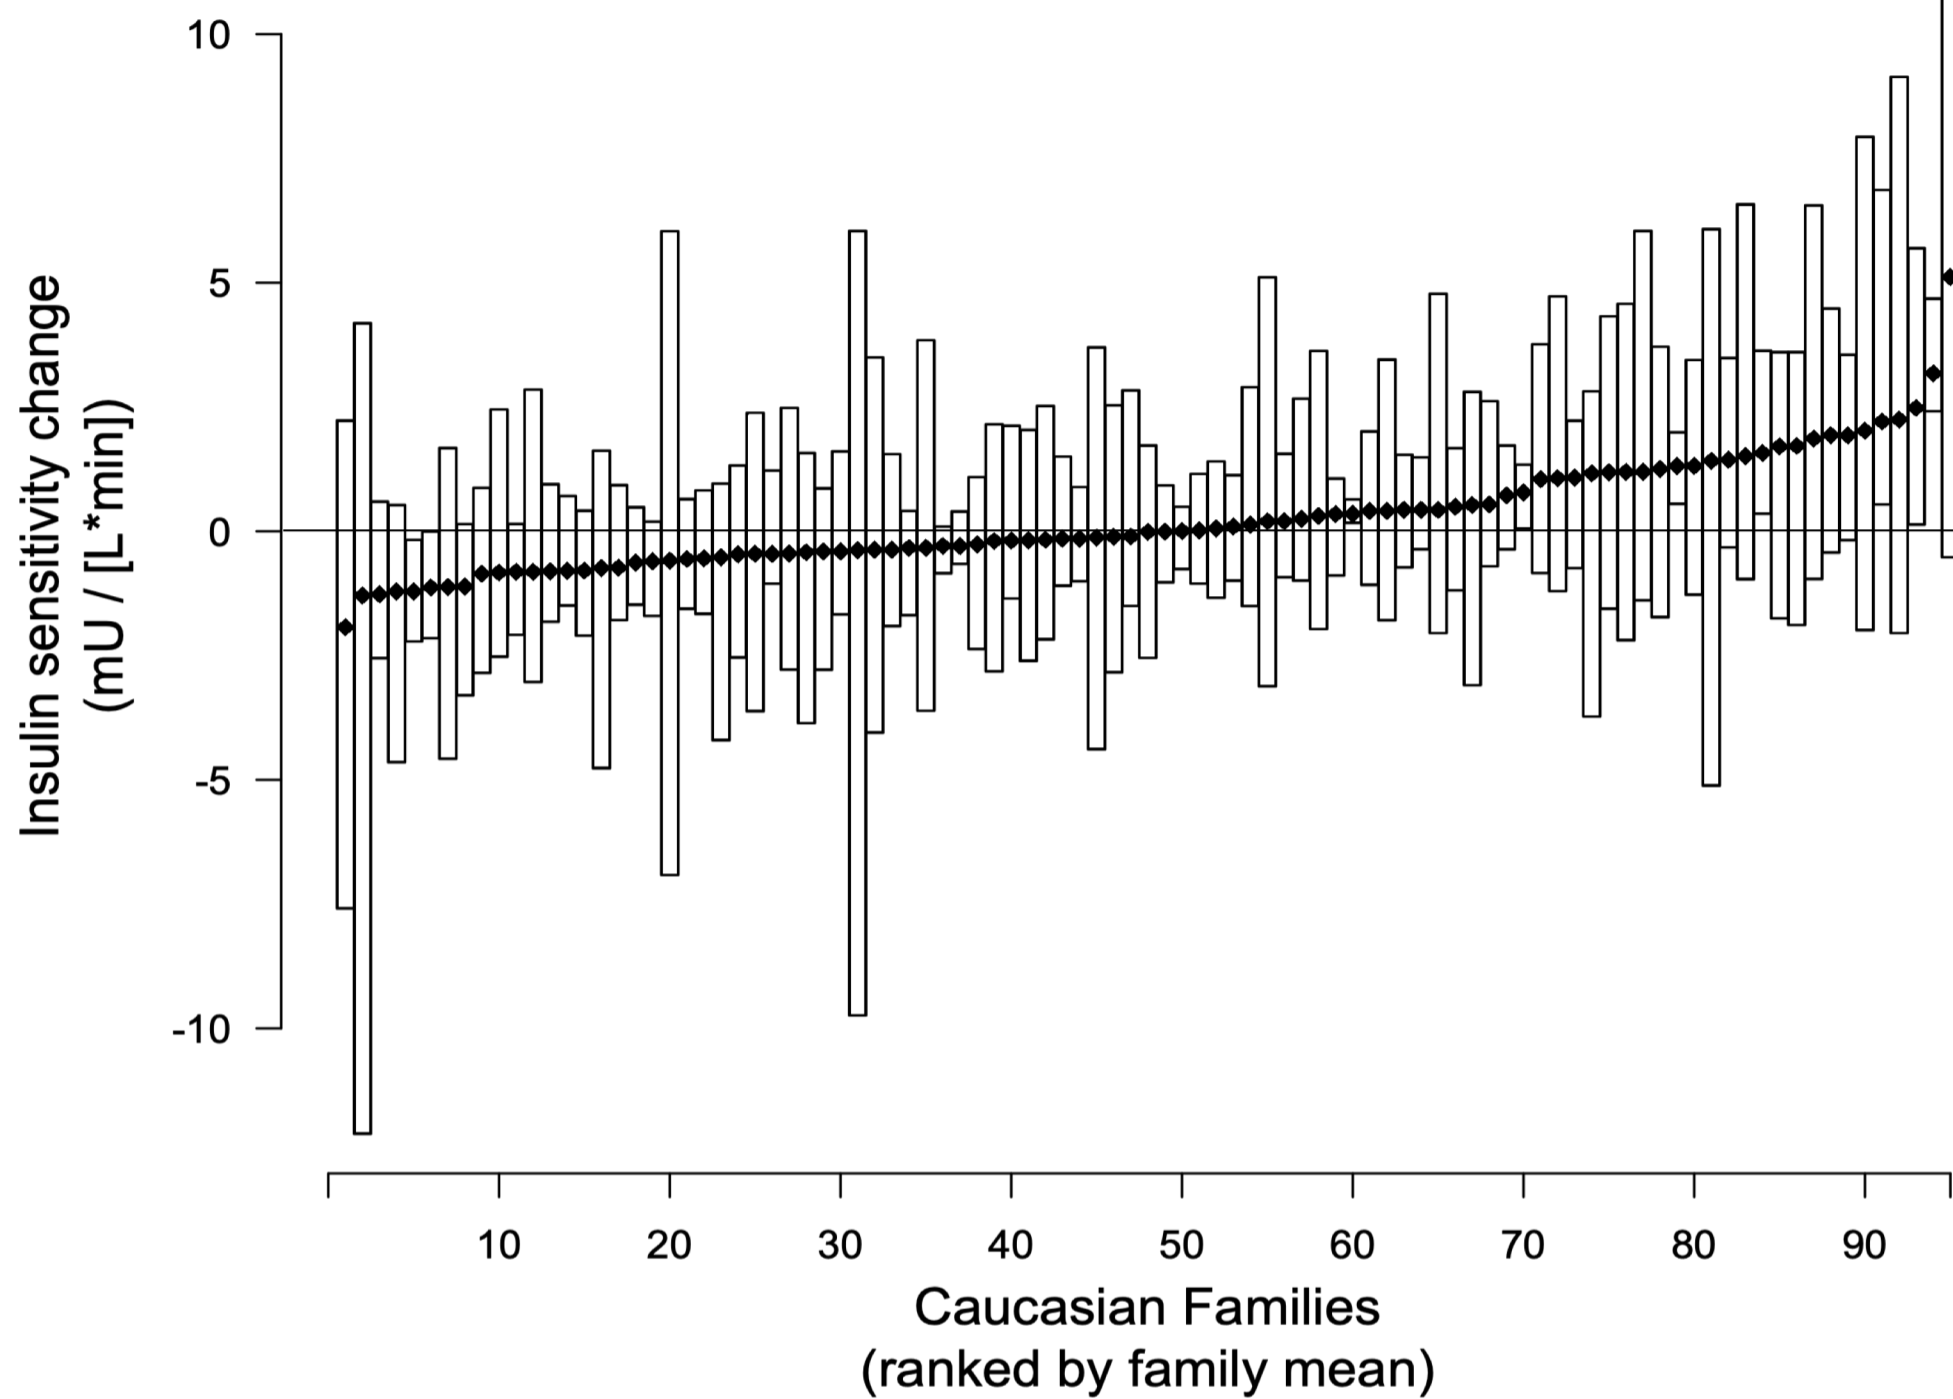

**Figure S1:** Training-induced change in peripheral insulin sensitivity plotted against Caucasian family rank (*i.e.* families ranked by family mean) in the HERITAGE study. Only families with at least 3 members are shown (94 families in total); family average was 4.3 members (parents and offspring considered). Each vertical box represents the range of training response across all family members (parents and offspring). Darker horizontal reference line denotes family mean. The  $F$ -value from the ANOVA indicates that there is 40% more variance between than within families ( $p=0.02$ ), with 29% of the variance being accounted for by family membership.

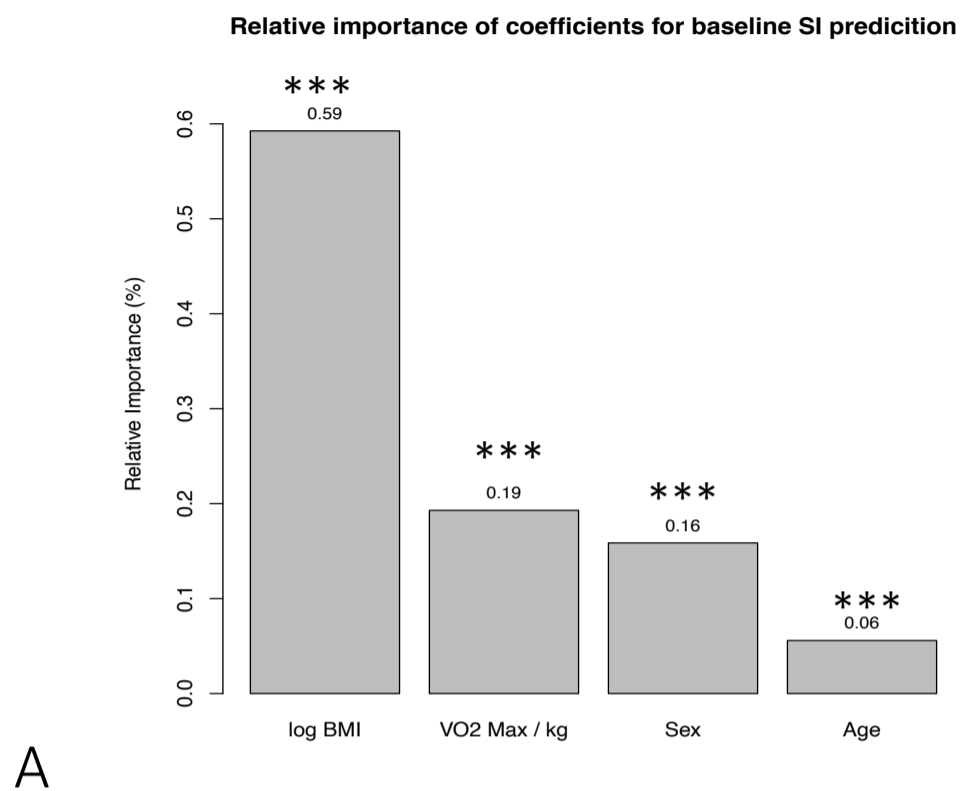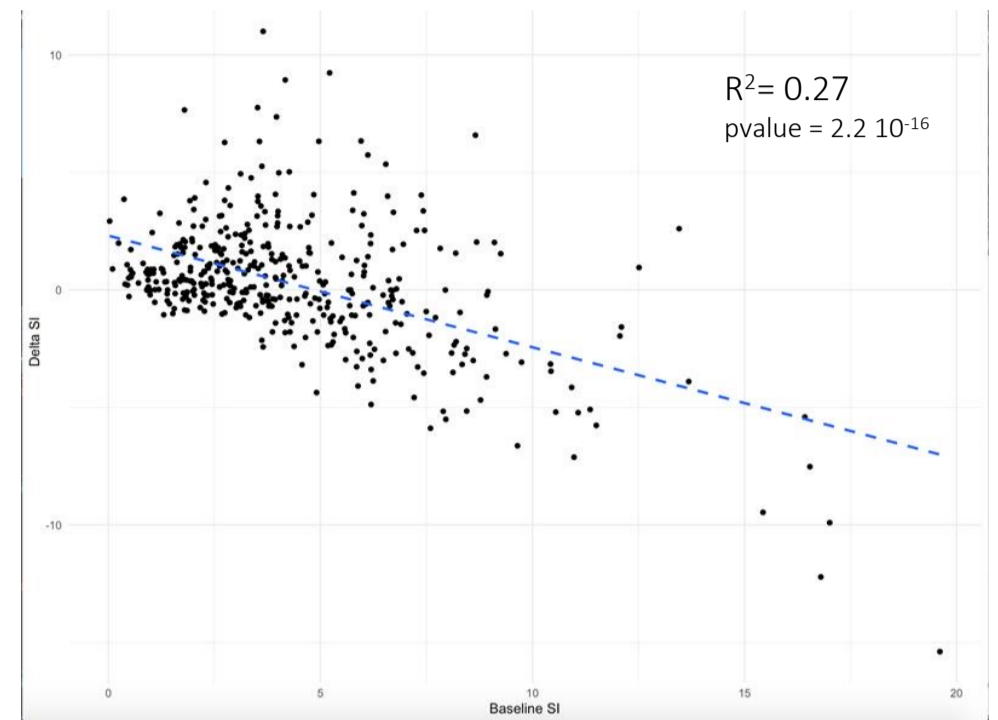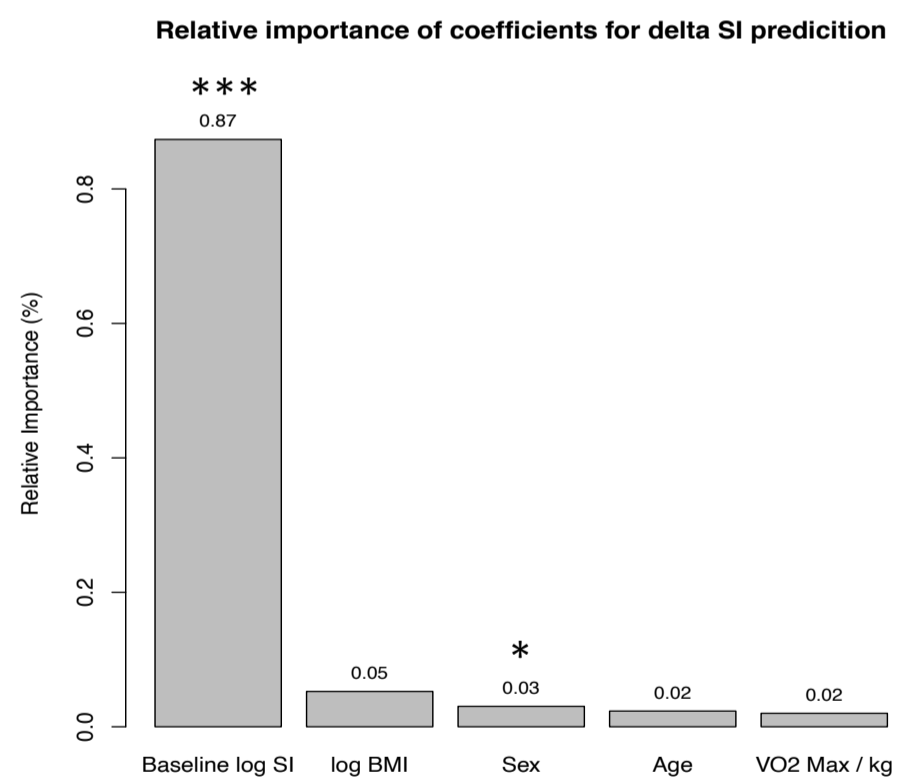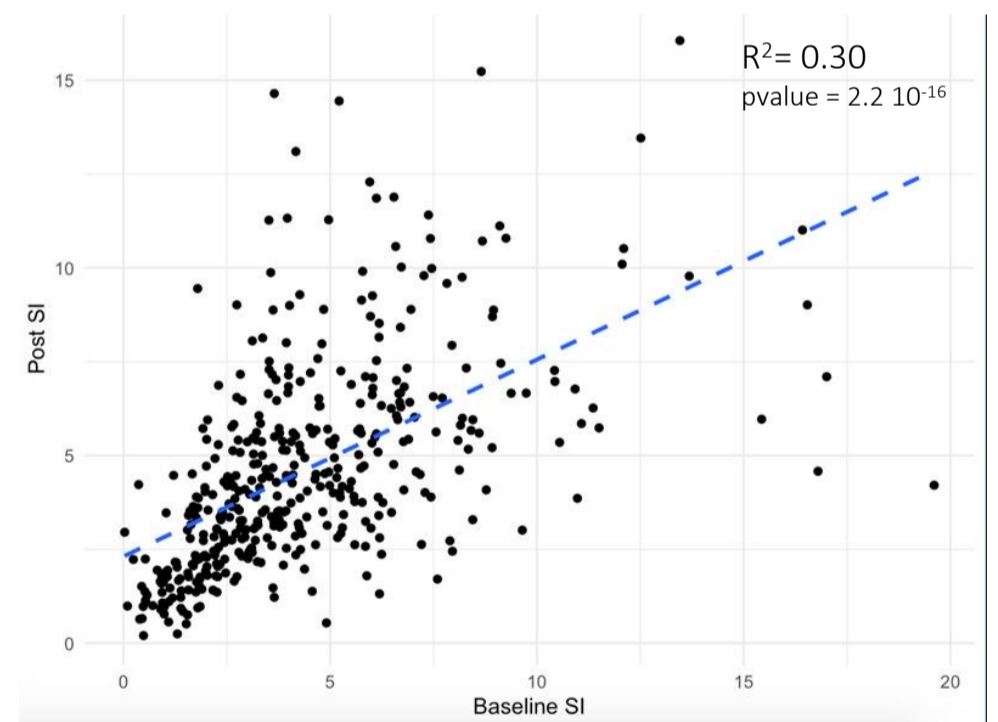

**Figure S2:** Relative importance of variables in linear models regressing baseline Si (A) and  $\Delta$ Si (B) are indicated in the the top of each bar and have been calculated using the *Img* method from relaimpo R package. Statistical significance of each variable was also tested by generating ANOVA models (\*\*\*P < 0.001, \*\*P < 0.01, \*P < 0.05). (C) Linear model regressing  $\Delta$ Si against baseline Si, (D) Linear model regressing post-training Si against baseline Si.

## Baseline SI

### Signaling

*Chemokine Signaling*

*Smooth Muscle contraction*

Calcium Signaling

GNRH Signaling

## Delta SI

### Signaling

*Chemokine Signaling*

*Cardiac Muscle contraction*

Signaling Pathways

Effector Pathways

### Tissue Homeostasis

Vasculogenesis\*

### Glycan Biosynthesis

Glycosphingolipid biosynthesis

Biosynthesis of O-Glycans

### Aminoacid Metabolism

Glycine-Serine and Threonine

Purine Metabolism

Cysteine Metabolism

Seleno-aminoacid Metabolism

### Lipid Metabolism

Glycerophospholipid

Metabolism

### Neuronal

Axon Guidance

Long term potentiation

### Protein Degradation

Ubiquitin-mediated proteolysis

### Transcription

Spliceosome

### Tissue Homeostasis

Endocytosis

Adhesion molecules

Sarcomeric-Z-disc associated\*

### Carbohydrate Metabolism

Galactose metabolism

### Excretory System

Proximal tubule bicarbonate

reclamation

\* *Skeletal Muscle curated pathways*

**Figure S3:** Functional GWAS. This is the result of the GLOSSI analysis including all genes rather than the highly significant ones.

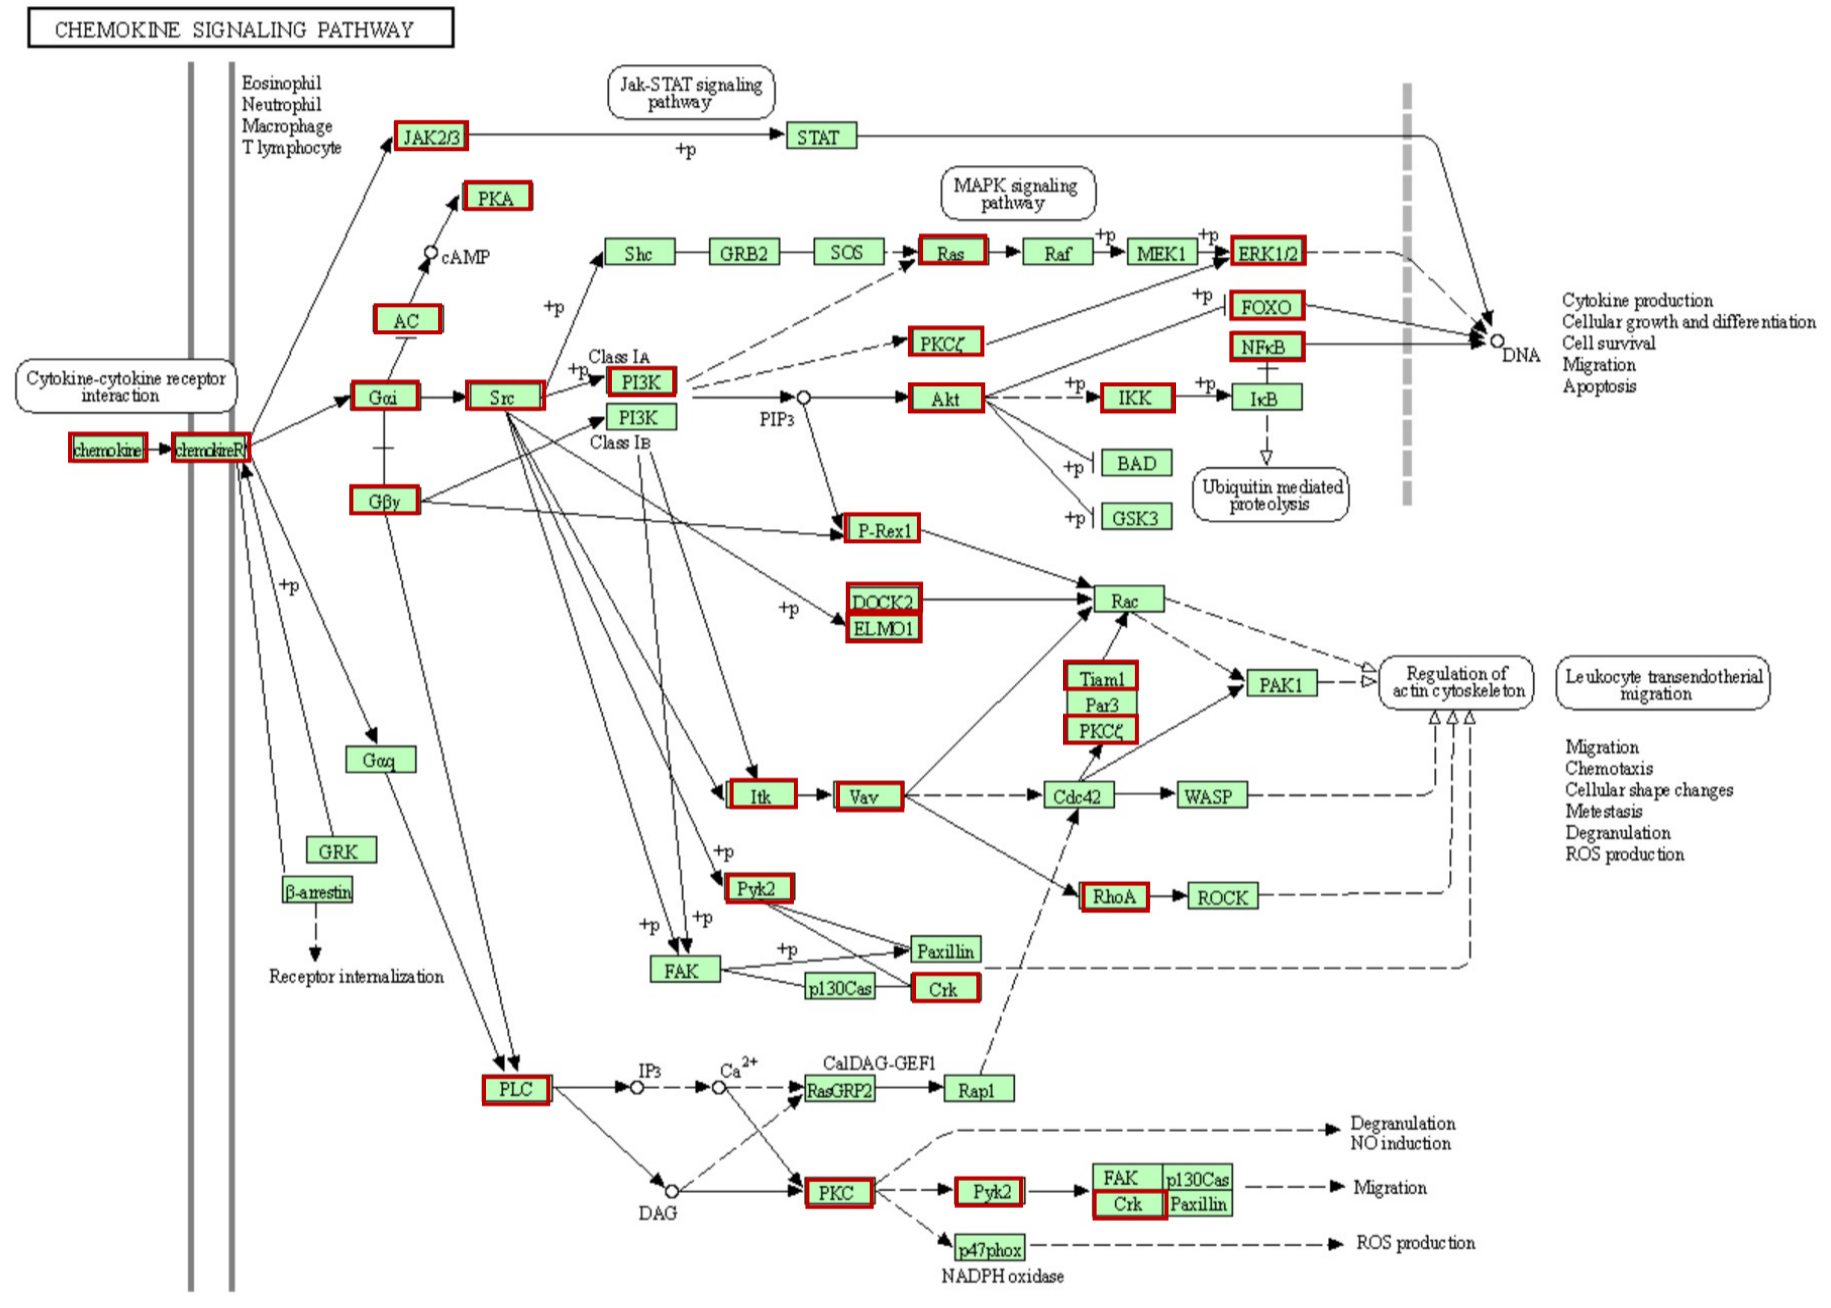

A

AXON GUIDANCE

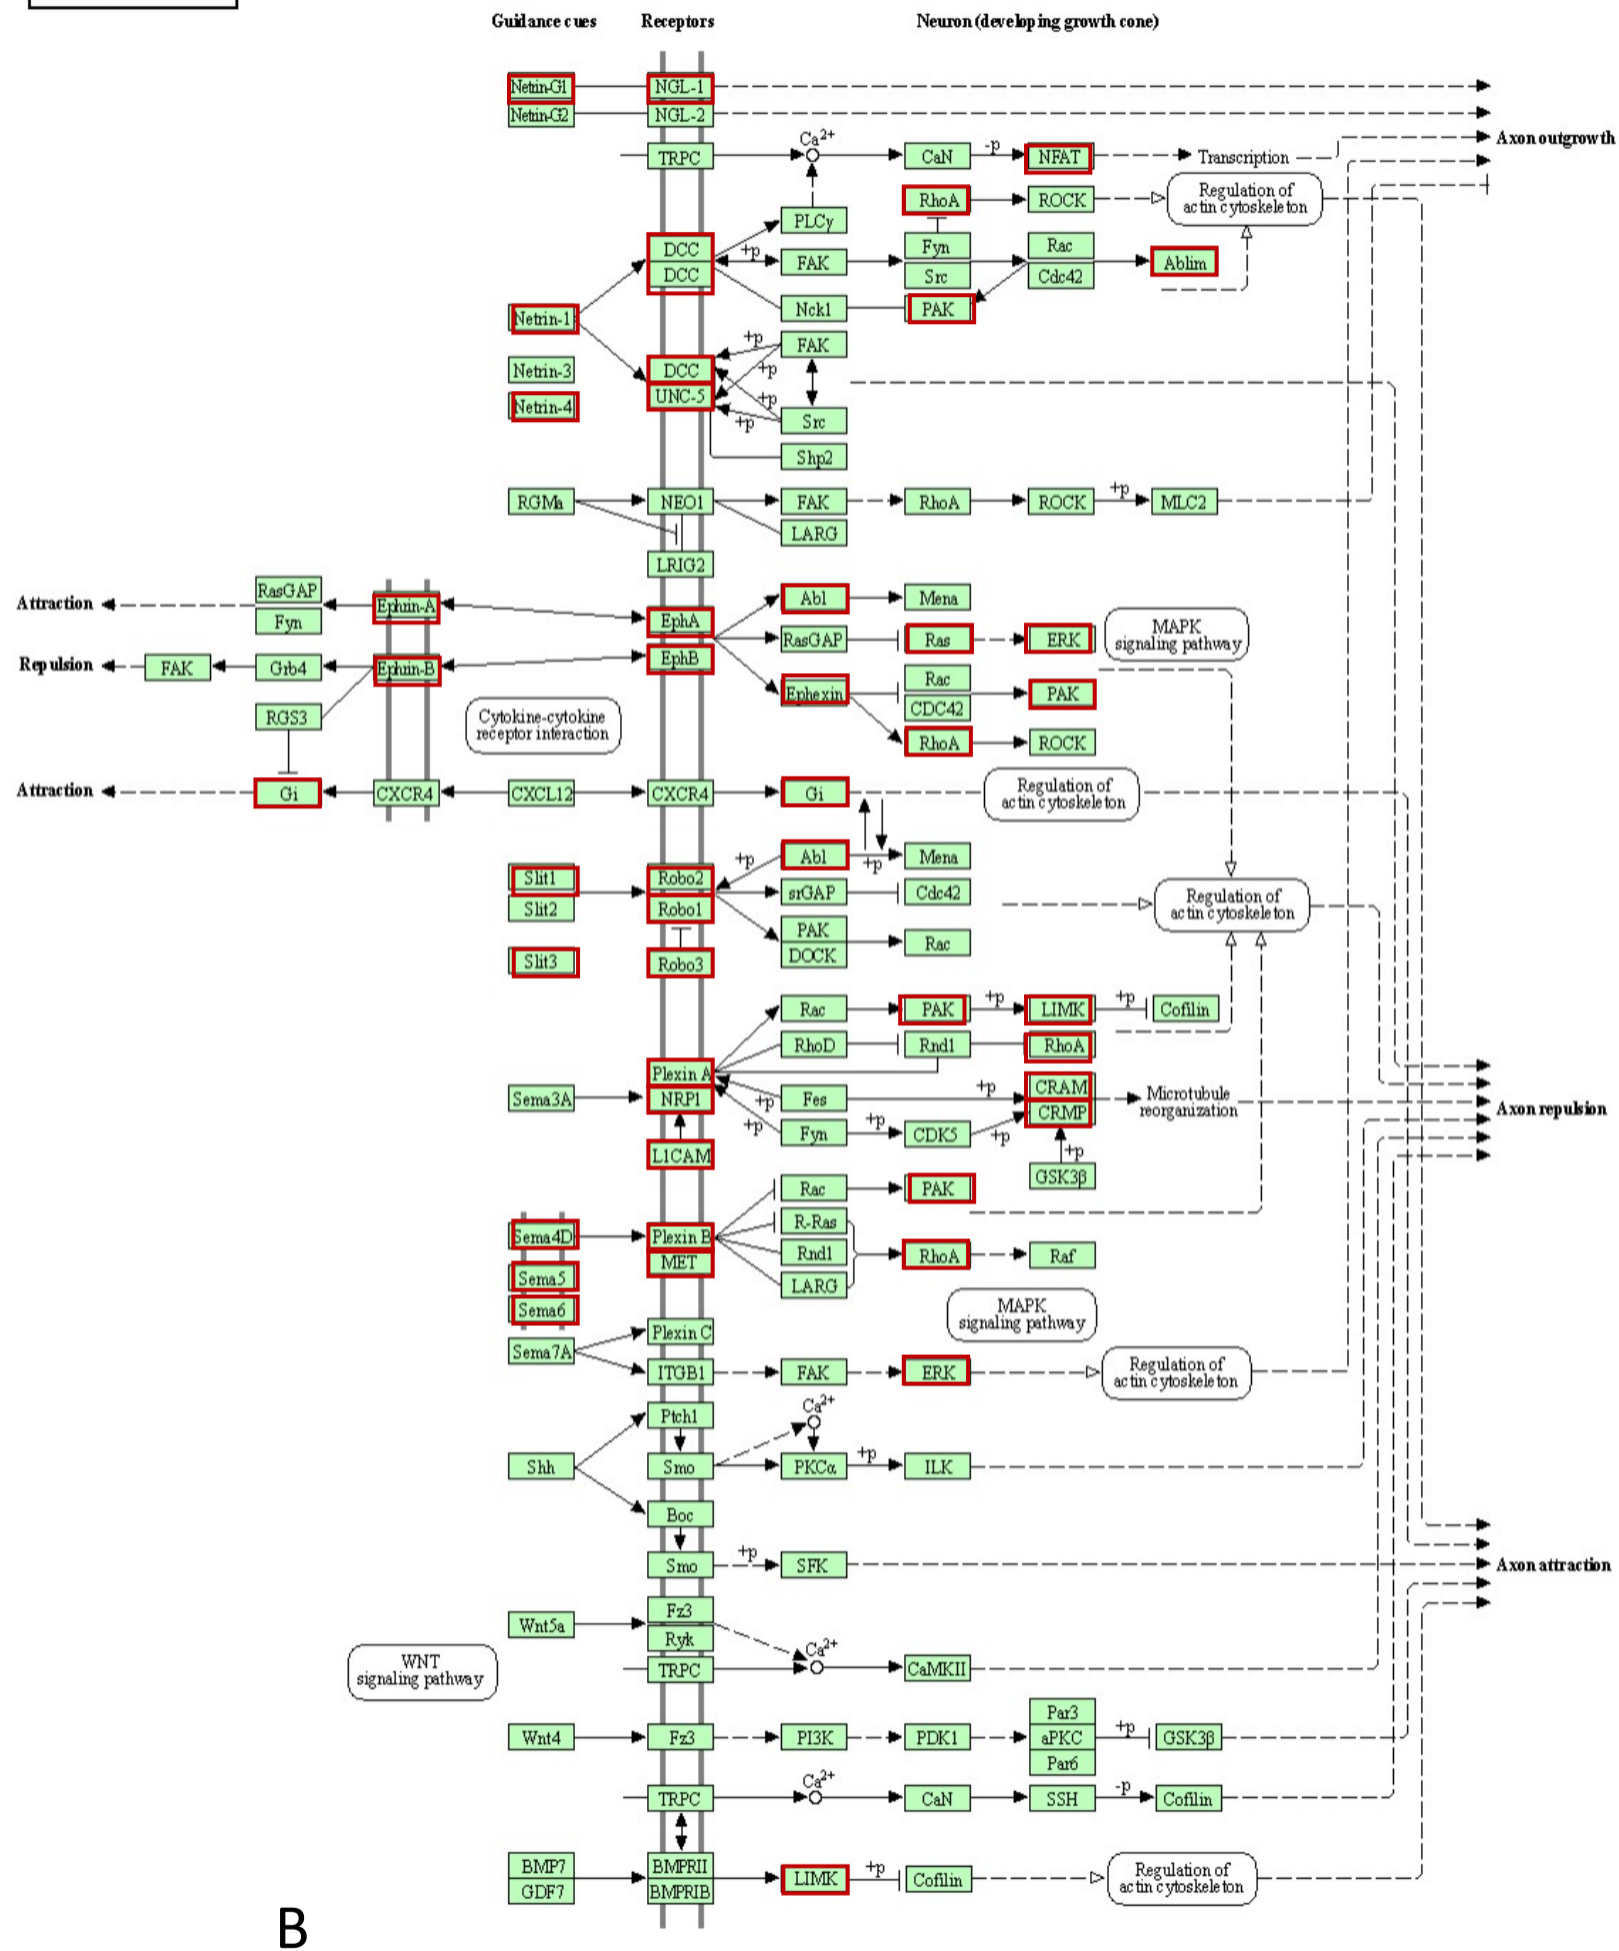

B

**Figure S4. Functional pathways enriched in the functional GWAS for baseline Si with highly significant SNPs**  
 The figure shows two of the four most significant pathways enriched in the functional GWAS. Panel A represent the KEGG pathway *Cytokine signaling*. Panel B represents the KEGG pathway *Axon guidance*. Genes are mapped on the pathway with red rectangles. The Figures are obtained by the KEGG database (copyright Kanehisa laboratory ).

## Delta SI (adjusted for Fiber Type %)

### Signaling

Olfactory Transduction  
Toll-like Receptor Signaling Pathway  
Fc Epsilon R1 Signaling Pathway  
B Cell Receptor Signaling Pathway  
***Chemokine Signaling Pathway***  
***Cytokine-Cytokine Receptor Interaction***  
Neuroactive Ligand Receptor Interaction  
Jak Stat Signaling Pathway  
Taste Transduction  
**Calcium dynamics / homeostasis required for ECC\***

Signaling Pathways

### Energy Metabolism

Citrate Cycle TCA Cycle  
Oxidative Phosphorylation  
Butanoate Metabolism  
Propanoate Metabolism  
Pyruvate Metabolism  
Glyoxylate And Dicarboxylate Metabolism  
Oxidative Metabolism\*  
Glycolytic Metabolism\*  
Mitochondrial Electron Transporters\*

### Translation

Aminoacyl tRNA Biosynthesis

### Protein Degradation

Ubiquitin-mediated proteolysis

### Aminoacid Metabolism

Valine Leucine And Isoleucine Degradation  
Arginine And Proline Metabolism  
Valine Leucine And Isoleucine Biosynthesis  
Seleno-amino Acid Metabolism

### Tissue Homeostasis

Focal Adhesion  
Cell Adhesion Molecules  
Regulation of Actin Cytoskeleton  
Fc Gamma R Mediated Phagocytosis  
Extracellular Matrix\*

### Immune System

Hematopoietic Cell Lineage  
Leukocyte Transendothelial Migration  
NK Cell Mediated Cytotoxicity  
Complement And Coagulation Cascades  
Antigen Processing And Presentation  
Inflammation\*

Effector Pathways

**Figure S5:** Transcriptional analysis of DSI associated transcriptome by GSEA



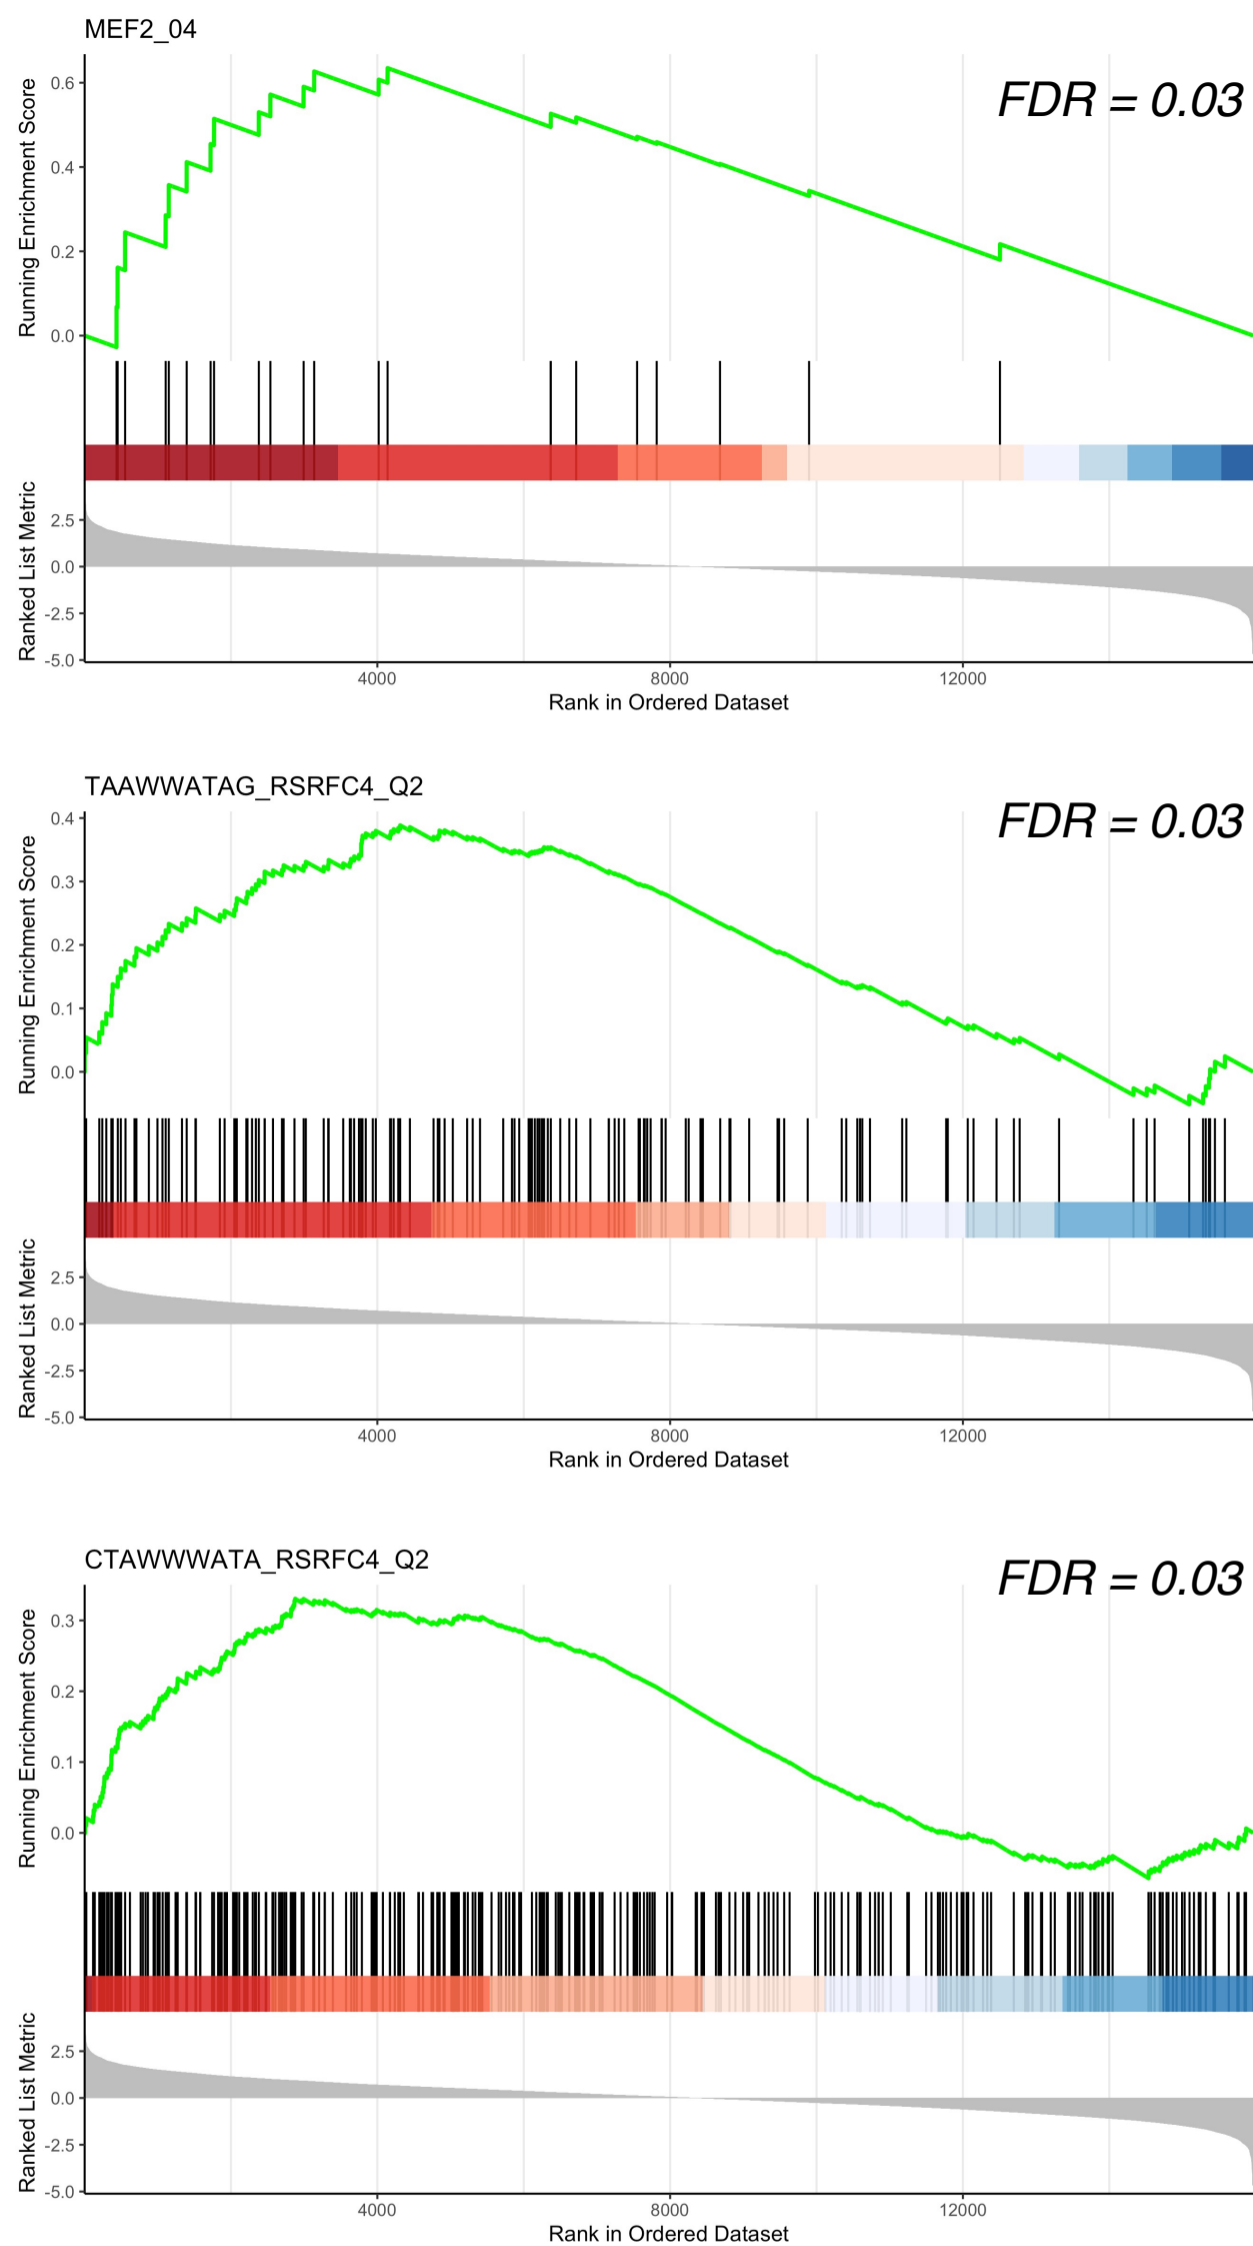

**Figure S6:** Enrichment score (ES) plots of MEF2A target gene sets showing over-representation of MEF2A targets on the positive end of the ranked gene list ( $FDR < 0.05$ ). Ranking is based on T-values from linear mixed models regressing delta Si with baseline mRNA levels and predictors shown as Ranked List Metric. Positive ES values point to enrichment among genes positively correlated with delta Si. Vertical bars refer to individual genes in a gene set and their position reflects the contribution of each gene to the ES. Genes that belong to the leading edge (i.e. genes that appear before or at the maximum ES contribute to the enrichment signal (Supplementary Table S4).

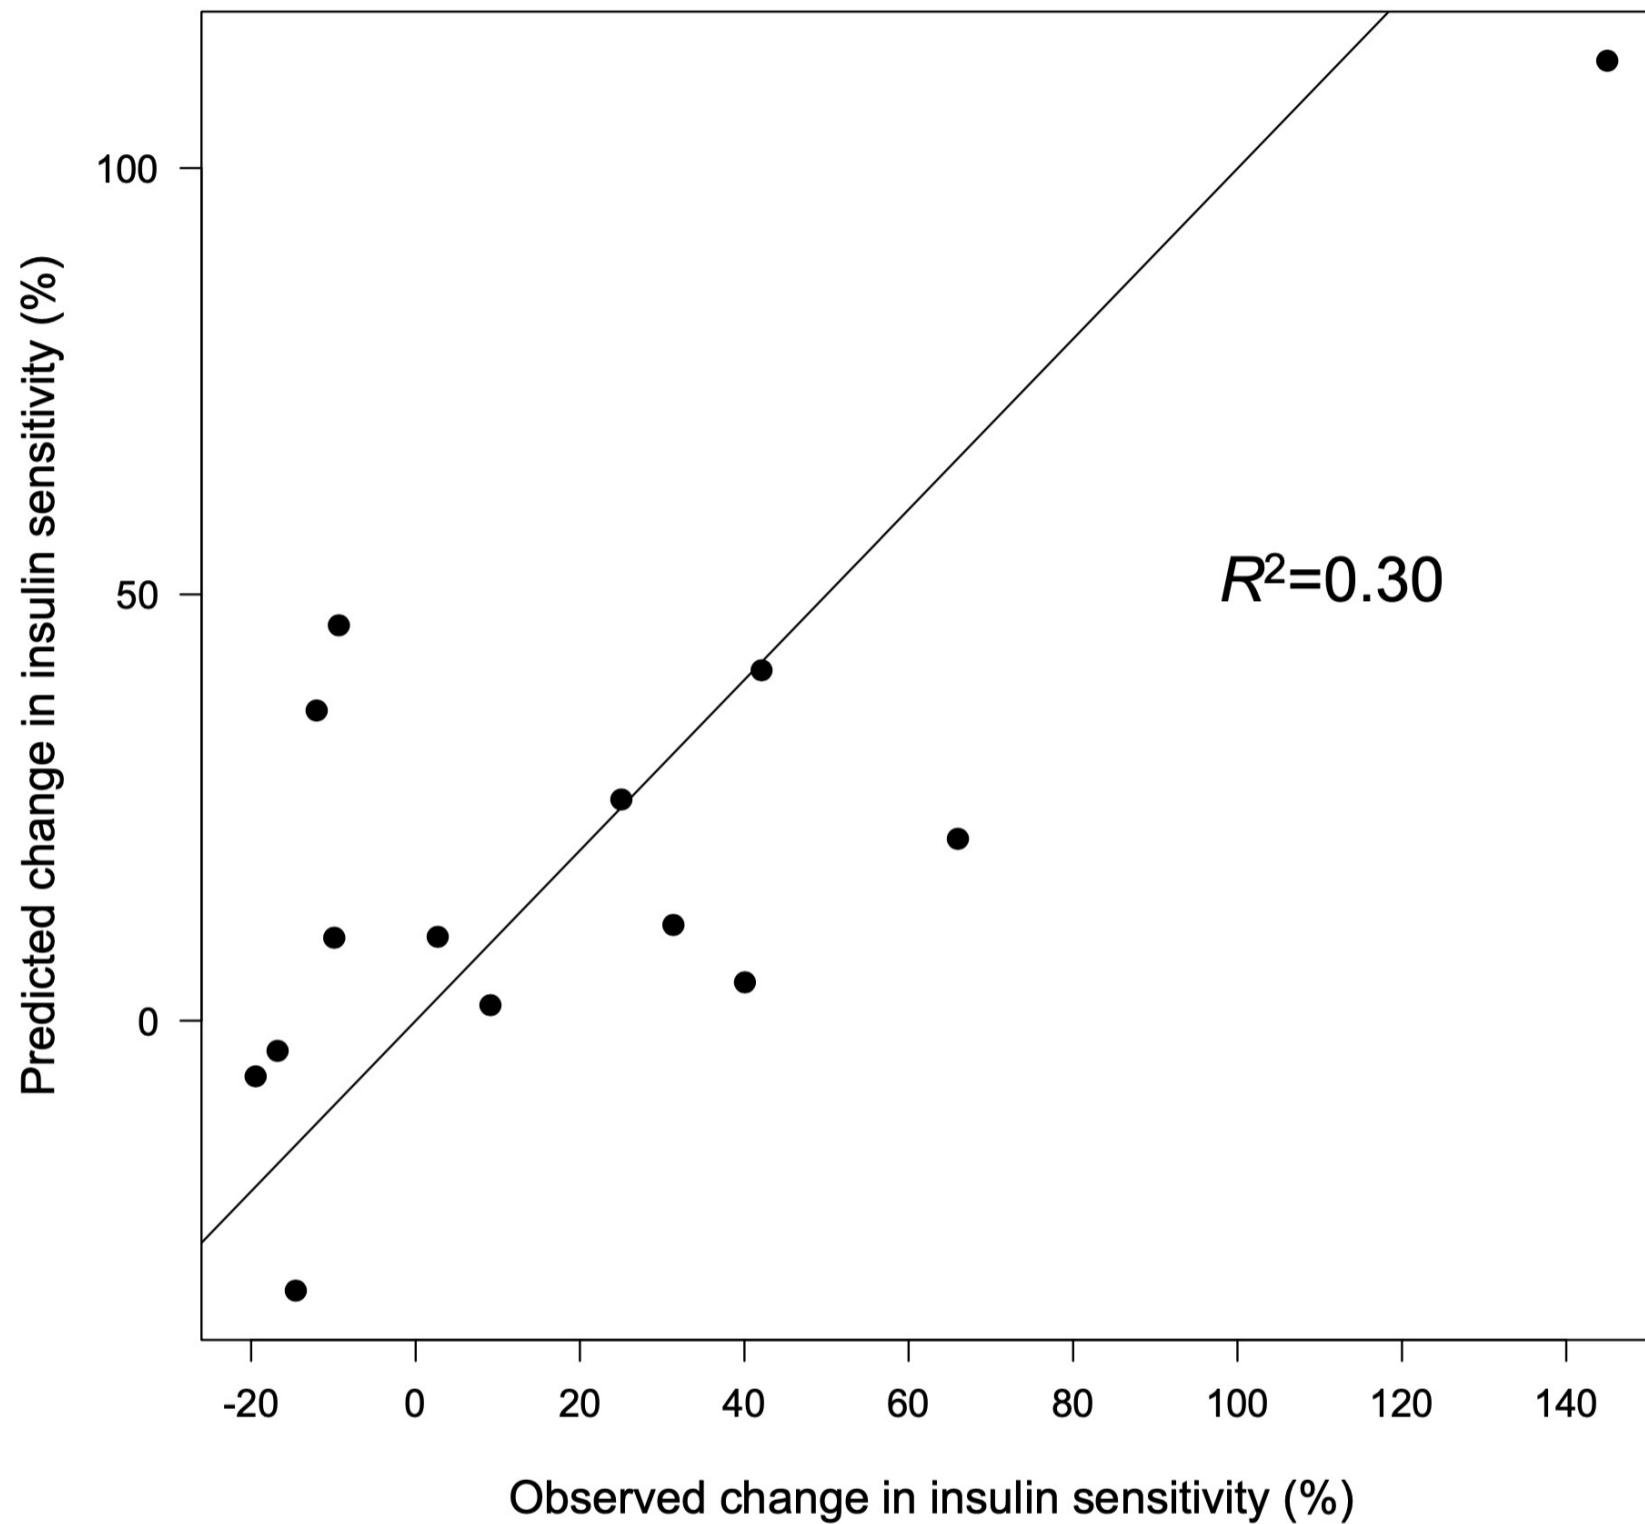

**Figure S7:** Performance of the mRNA-based regression model derived from the HERITAGE study in an independent training cohort. In this study, peripheral glucose disappearance ( $R_d$ ) was measured using the hyperinsulinemic-euglycemic clamp technique. Scatter plot of experimentally determined (observed) changes in peripheral insulin sensitivity versus predicted values for training-induced changes in peripheral insulin sensitivity ( $n=14$ ,  $r^2=0.30$ ).
